# Supplementary material for: Investigating the pharmacodynamic durability of GalNAc–siRNA conjugates
Source: PubMed Central journal article supplement (PMC7708070; doi:10.1093/nar/gkaa670), 2020-08-18
Supplement: gkaa670_supplemental_file.pdf [file gkaa670_supplemental_file.pdf]

## **Supplementary Information:**

### **Investigating the Pharmacodynamic Durability of GalNAc-siRNA Conjugates**

Christopher R. Brown<sup>1</sup>, Swati Gupta<sup>1</sup>, June Qin<sup>1</sup>, Timothy Racie<sup>1</sup>, Guo He<sup>1</sup>, Scott Lentini<sup>1</sup>, Ryan Malone<sup>1</sup>, Mikyung Yu<sup>1</sup>, Shigeo Matsuda<sup>1</sup>, Svetlana Shulga-Morskaya<sup>1</sup>, Anil V. Nair<sup>2</sup>, Christopher S. Theile<sup>1</sup>, Karyn Schmidt<sup>1</sup>, Azar Shahraz<sup>1</sup>, Varun Goel<sup>1</sup>, Rubina G. Parmar<sup>1</sup>, Ivan Zlatev<sup>1</sup>, Mark K. Schlegel<sup>1</sup>, Jayaprakash K. Nair<sup>1</sup>, Muthusamy Jayaraman<sup>1</sup>, Muthiah Manoharan<sup>1</sup>, Dennis Brown<sup>2</sup>, Martin A. Maier<sup>1</sup>, Vasant Jadhav<sup>1\*</sup>

<sup>1</sup>Anylam Pharmaceuticals, Inc., Cambridge, MA 02142, USA

<sup>2</sup>MGH Program in Membrane Biology, Division of Nephrology, Massachusetts General Hospital and Harvard Medical School, Boston, MA 02114, USA

\* Correspondence should be addressed to V.J. (vjadhav@anylam.com)

## Table of Contents

|                                                     |    |
|-----------------------------------------------------|----|
| Supplementary Methods.....                          | 3  |
| Compound <b>802</b> MALDI data file. ....           | 3  |
| Compound <b>804</b> MALDI data file. ....           | 4  |
| Statistical Supplemental Methods for Figure 7 ..... | 5  |
| Statistical Supplemental Methods for Figure 8.....  | 9  |
| Statistical Supplemental Methods for Figure 9.....  | 13 |
| Statistical Supplemental Methods for Figure 10..... | 17 |
| Supplemental Table S1.....                          | 19 |
| Supplementary Figures .....                         | 20 |
| Supplementary Reference.....                        | 22 |

## SUPPLEMENTARY METHODS

Compound **802** MALDI data file.

Mass calc. for  $C_{75}H_{128}N_{12}O_{29}S_2$ : 1726.02, found: 1750.084 (M+Na) MALDI.

Comment 1

Comment 2

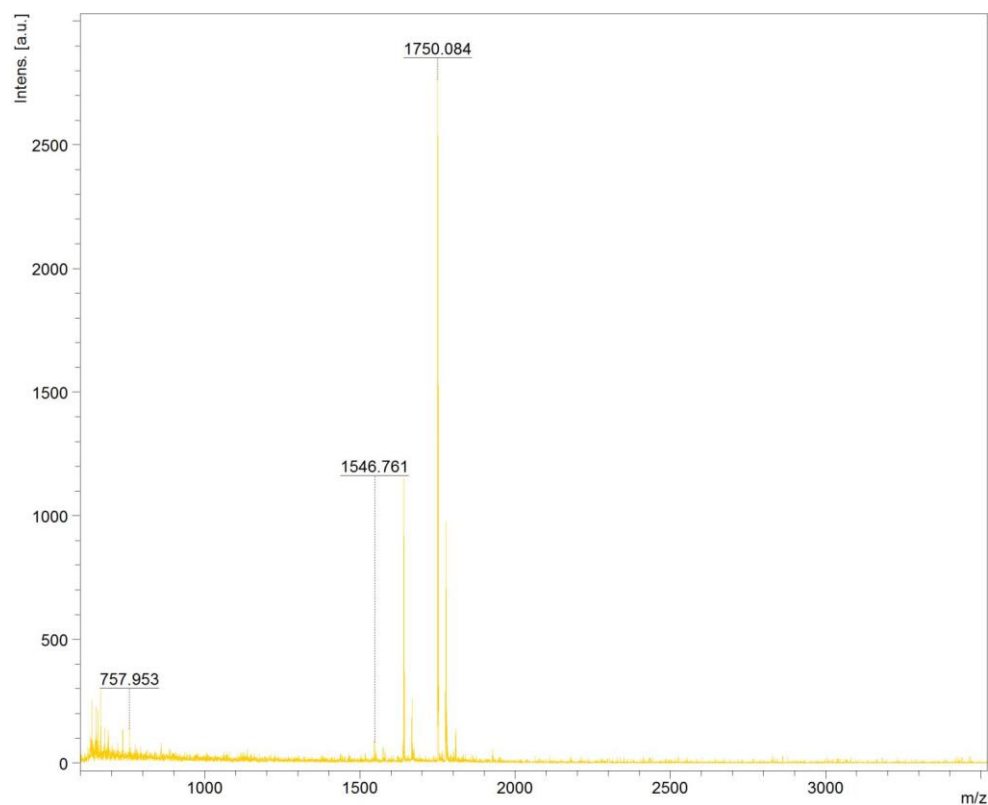

### Acquisition Parameter

|                                       |                                                   |
|---------------------------------------|---------------------------------------------------|
| Date of acquisition                   | 2020-06-10T10:35:47.268-04:00                     |
| Acquisition method name               | D:\Methods\flexControlMethods\RP_1000-3000_Da.par |
| Acquisition operation mode            | Reflector                                         |
| Voltage polarity                      | POS                                               |
| Number of shots                       | 500                                               |
| Name of spectrum used for calibration |                                                   |
| Calibration reference list used       | PeptideCalibStandard mono                         |

### Instrument Info

|                 |           |
|-----------------|-----------|
| User            | joy       |
| Instrument      | FLEX-PC   |
| Instrument type | microflex |

Compound **804** MALDI data file.

Mass calc. for  $C_{189}H_{303}N_{39}O_{70}S_2$ : 4305.83, found: 4329.858 (M+Na) MALDI.

---

D:\Data\Specs\2016Joy\2018-Ashish\20180607\RP-998-156\0\_F10\1\1Ref

---

Comment 1

Comment 2

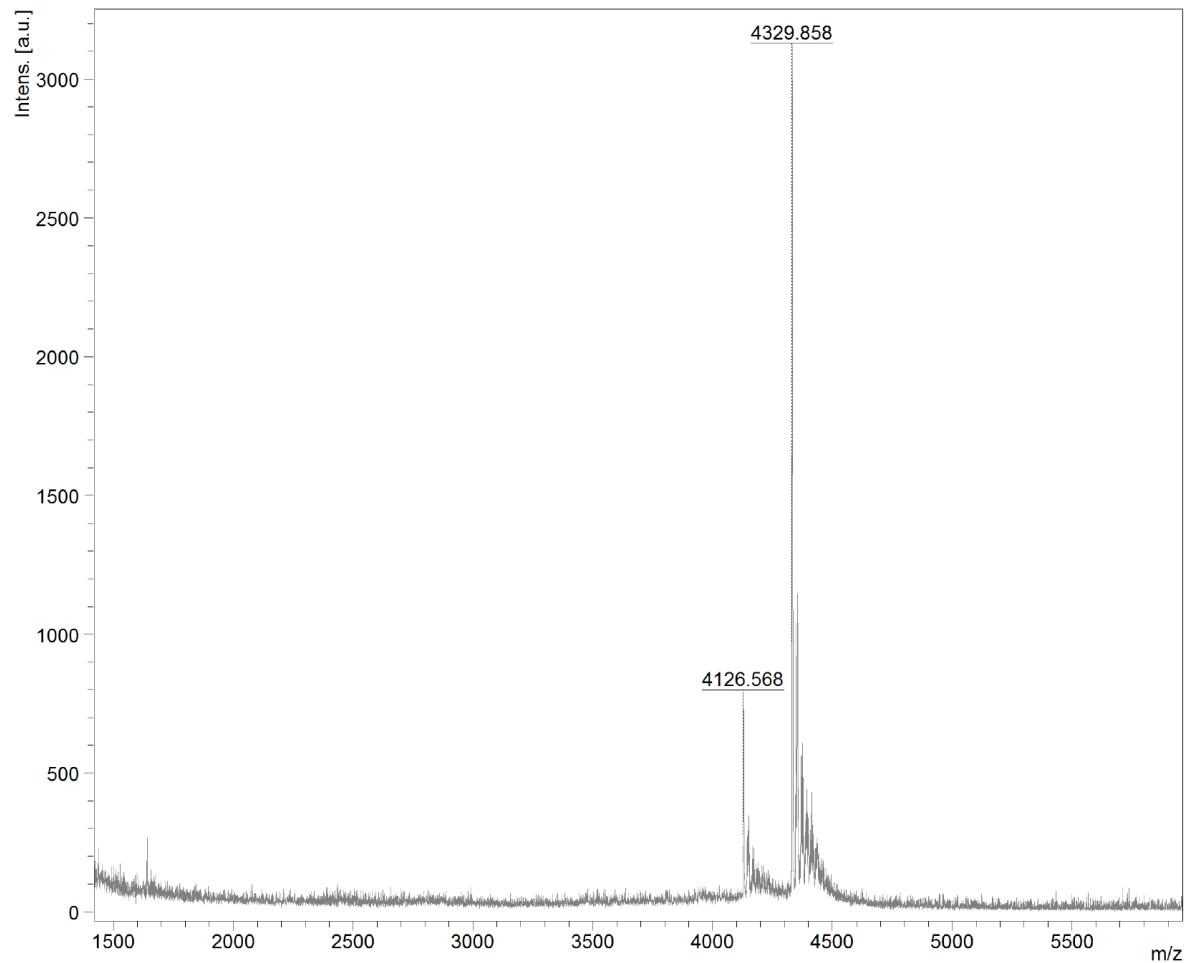

---

**Acquisition Parameter**

|                                       |                                                   |
|---------------------------------------|---------------------------------------------------|
| Date of acquisition                   | 2019-02-06T07:52:40.736-05:00                     |
| Acquisition method name               | D:\Methods\flexControlMethods\RP_1000-3000_Da.par |
| Acquisition operation mode            | Reflector                                         |
| Voltage polarity                      | POS                                               |
| Number of shots                       | 1107                                              |
| Name of spectrum used for calibration |                                                   |
| Calibration reference list used       | PeptideCalibStandard mono                         |

## Statistical Supplemental Methods for Figure 7

### Method of analysis:

Due to unequal variance, Welch's independent t-test was utilized to compare the mean value between the control and peptide-treated group at each timepoint.

Statistics for Figure 7A - Comparison of serum TTR levels between control and treatment group where peptide was administered at day 7 following ESC siRNA (1.5mg/kg, siTTR-1).

| <i>Timepoint<br/>(days)</i> |            | <i>Control</i> | <i>+ Peptide</i> | <i>Difference</i> | <i>95% CI<br/>Upper</i> | <i>95% CI<br/>Lower</i> | <i>t</i> | <i>df</i> | <i>p-<br/>value</i> |
|-----------------------------|------------|----------------|------------------|-------------------|-------------------------|-------------------------|----------|-----------|---------------------|
| 3                           | <i>M</i>   | 0.24           | 0.23             |                   |                         |                         |          |           |                     |
|                             | <i>+SD</i> | 0.03           | 0.05             | -0.01             | 0.10                    | -0.11                   | -0.25    | 2.98      | 0.82                |
|                             | <i>N</i>   | 3              | 3                |                   |                         |                         |          |           |                     |
| 7                           | <i>M</i>   | 0.25           | 0.21             |                   |                         |                         |          |           |                     |
|                             | <i>+SD</i> | 0.09           | 0.04             | -0.04             | 0.16                    | -0.23                   | -0.67    | 2.87      | 0.55                |
|                             | <i>N</i>   | 3              | 3                |                   |                         |                         |          |           |                     |
| 10                          | <i>M</i>   | 0.23           | 0.17             |                   |                         |                         |          |           |                     |
|                             | <i>+SD</i> | 0.02           | 0.07             | -0.05             | 0.09                    | -0.20                   | -1.38    | 2.34      | 0.28                |
|                             | <i>N</i>   | 3              | 3                |                   |                         |                         |          |           |                     |
| 14                          | <i>M</i>   | 0.33           | 0.27             |                   |                         |                         |          |           |                     |
|                             | <i>+SD</i> | 0.06           | 0.08             | -0.06             | 0.11                    | -0.23                   | -0.98    | 3.49      | 0.39                |
|                             | <i>N</i>   | 3              | 3                |                   |                         |                         |          |           |                     |
| 21                          | <i>M</i>   | 0.55           | 0.49             |                   |                         |                         |          |           |                     |
|                             | <i>+SD</i> | 0.09           | 0.13             | -0.06             | 0.19                    | -0.32                   | -0.71    | 3.66      | 0.52                |
|                             | <i>N</i>   | 3              | 3                |                   |                         |                         |          |           |                     |
| 35                          | <i>M</i>   | 0.92           | 0.87             |                   |                         |                         |          |           |                     |
|                             | <i>+SD</i> | 0.06           | 0.13             | -0.05             | 0.23                    | -0.34                   | -0.62    | 2.87      | 0.58                |
|                             | <i>N</i>   | 3              | 3                |                   |                         |                         |          |           |                     |

*All p-values are derived from a two-tailed hypothesis test. M = mean, SD = standard deviation, N = number of animals.*

Statistical Supplement for Figure 7

Statistics for Figure 7B - Comparison of serum TTR levels between control and treatment group where peptide was administered at day 7 following Advanced ESC siRNA (0.5mg/kg, siTTR-3).

| <i>Timepoint<br/>(days)</i> |            | <i>Control</i> | <i>+Peptide</i> | <i>Difference</i> | <i>95% CI<br/>Upper</i> | <i>95% CI<br/>Lower</i> | <i>t</i> | <i>df</i> | <i>p-<br/>value</i> |
|-----------------------------|------------|----------------|-----------------|-------------------|-------------------------|-------------------------|----------|-----------|---------------------|
| 3                           | <i>M</i>   | 0.44           | 0.57            |                   |                         |                         |          |           |                     |
|                             | <i>+SD</i> | 0.07           | 0.08            | 0.13              | 0.29                    | -0.03                   | 2.23     | 3.93      | 0.09                |
|                             | <i>N</i>   | 3              | 3               |                   |                         |                         |          |           |                     |
| 7                           | <i>M</i>   | 0.25           | 0.32            |                   |                         |                         |          |           |                     |
|                             | <i>+SD</i> | 0.02           | 0.03            | 0.07              | 0.13                    | 0.01                    | 3.49     | 3.18      | 0.04                |
|                             | <i>N</i>   | 3              | 3               |                   |                         |                         |          |           |                     |
| 10                          | <i>M</i>   | 0.26           | 0.10            |                   |                         |                         |          |           |                     |
|                             | <i>+SD</i> | 0.04           | 0.03            | -0.16             | -0.08                   | -0.24                   | -5.83    | 3.36      | 0.007               |
|                             | <i>N</i>   | 3              | 3               |                   |                         |                         |          |           |                     |
| 14                          | <i>M</i>   | 0.25           | 0.10            |                   |                         |                         |          |           |                     |
|                             | <i>+SD</i> | 0.08           | 0.05            | -0.15             | 0.02                    | -0.32                   | -2.65    | 3.20      | 0.072               |
|                             | <i>N</i>   | 3              | 3               |                   |                         |                         |          |           |                     |
| 21                          | <i>M</i>   | 0.33           | 0.20            |                   |                         |                         |          |           |                     |
|                             | <i>+SD</i> | 0.08           | 0.03            | -0.13             | 0.35                    | -0.60                   | -2.18    | 1.24      | 0.23                |
|                             | <i>N</i>   | 2              | 2               |                   |                         |                         |          |           |                     |
| 35                          | <i>M</i>   | 0.53           | 0.38            |                   |                         |                         |          |           |                     |
|                             | <i>+SD</i> | 0.12           | 0.05            | -0.15             | 0.54                    | -0.84                   | -1.59    | 1.31      | 0.31                |
|                             | <i>N</i>   | 2              | 2               |                   |                         |                         |          |           |                     |

All *p-values* are derived from a two-tailed hypothesis test. *M* = mean, *SD* = standard deviation, *N* = number of animals.

Statistical Supplement for Figure 7

Statistics for Figure 7C - Comparison of serum TTR levels between control and treatment group where peptide was administered 15 minutes following ESC siRNA (1.5mg/kg, siTTR-1).

| <i>Timepoint<br/>(days)</i> |            | <i>Control</i> | <i>+ Peptide</i> | <i>Difference</i> | <i>95% CI<br/>Upper</i> | <i>95% CI<br/>Lower</i> | <i>t</i> | <i>df</i> | <i>p-<br/>value</i> |
|-----------------------------|------------|----------------|------------------|-------------------|-------------------------|-------------------------|----------|-----------|---------------------|
| 3                           | <i>M</i>   | 0.24           | 0.04             |                   |                         |                         |          |           |                     |
|                             | <i>+SD</i> | 0.03           | 0.01             | -0.20             | -0.13                   | -0.26                   | -12.10   | 2.23      | 0.004               |
|                             | <i>N</i>   | 3              | 3                |                   |                         |                         |          |           |                     |
| 7                           | <i>M</i>   | 0.25           | 0.02             |                   |                         |                         |          |           |                     |
|                             | <i>+SD</i> | 0.09           | 0.01             | -0.23             | -0.00                   | -0.46                   | -4.27    | 2.02      | 0.05                |
|                             | <i>N</i>   | 3              | 3                |                   |                         |                         |          |           |                     |
| 10                          | <i>M</i>   | 0.23           | 0.02             |                   |                         |                         |          |           |                     |
|                             | <i>+SD</i> | 0.02           | 0.02             | -0.21             | -0.16                   | -0.26                   | -12.62   | 3.92      | 0.0003              |
|                             | <i>N</i>   | 3              | 3                |                   |                         |                         |          |           |                     |
| 14                          | <i>M</i>   | 0.33           | 0.03             |                   |                         |                         |          |           |                     |
|                             | <i>+SD</i> | 0.06           | 0.01             | -0.30             | -0.17                   | -0.43                   | -9.25    | 2.14      | 0.009               |
|                             | <i>N</i>   | 3              | 2                |                   |                         |                         |          |           |                     |
| 21                          | <i>M</i>   | 0.55           | 0.20             |                   |                         |                         |          |           |                     |
|                             | <i>+SD</i> | 0.09           | 0.14             | -0.35             | -0.07                   | -0.63                   | -3.65    | 3.51      | 0.03                |
|                             | <i>N</i>   | 3              | 3                |                   |                         |                         |          |           |                     |
| 35                          | <i>M</i>   | 0.92           | 0.52             |                   |                         |                         |          |           |                     |
|                             | <i>+SD</i> | 0.06           | 0.13             | -0.40             | -0.13                   | -0.68                   | -4.72    | 2.90      | 0.02                |
|                             | <i>N</i>   | 3              | 3                |                   |                         |                         |          |           |                     |

All *p*-values are derived from a two-tailed hypothesis test. *M* = mean, *SD* = standard deviation, *N* = number of animals.

Statistical Supplement to Figure 7

Statistics for Figure 7D - Comparison of serum TTR levels between control and treatment group where peptide was administered 15 minutes following ESC siRNA (0.5mg/kg, siTTR-1).

| <i>Timepoint<br/>(days)</i> |            | <i>Control</i> | <i>+ Peptide</i> | <i>Difference</i> | <i>95% CI<br/>Upper</i> | <i>95% CI<br/>Lower</i> | <i>t</i> | <i>df</i> | <i>p-<br/>value</i> |
|-----------------------------|------------|----------------|------------------|-------------------|-------------------------|-------------------------|----------|-----------|---------------------|
| 3                           | <i>M</i>   | 0.59           | 0.12             |                   |                         |                         |          |           |                     |
|                             | <i>+SD</i> | 0.12           | 0.07             | -0.48             | -0.22                   | -0.73                   | -5.76    | 3.27      | 0.008               |
|                             | <i>N</i>   | 3              | 3                |                   |                         |                         |          |           |                     |
| 7                           | <i>M</i>   | 0.61           | 0.14             |                   |                         |                         |          |           |                     |
|                             | <i>+SD</i> | 0.03           | 0.10             | -0.47             | -0.24                   | -0.69                   | -7.77    | 2.35      | 0.01                |
|                             | <i>N</i>   | 3              | 3                |                   |                         |                         |          |           |                     |
| 10                          | <i>M</i>   | 0.66           | 0.18             |                   |                         |                         |          |           |                     |
|                             | <i>+SD</i> | 0.02           | 0.12             | -0.48             | -0.19                   | -0.76                   | -6.82    | 2.12      | 0.02                |
|                             | <i>N</i>   | 3              | 3                |                   |                         |                         |          |           |                     |
| 14                          | <i>M</i>   | 0.80           | 0.33             |                   |                         |                         |          |           |                     |
|                             | <i>+SD</i> | 0.10           | 0.18             | -0.47             | -0.10                   | -0.84                   | -3.95    | 3.16      | 0.03                |
|                             | <i>N</i>   | 3              | 3                |                   |                         |                         |          |           |                     |
| 21                          | <i>M</i>   | 1.10           | 0.65             |                   |                         |                         |          |           |                     |
|                             | <i>+SD</i> | 0.08           | 0.21             | -0.44             | 0.01                    | -0.90                   | -3.42    | 2.58      | 0.053               |
|                             | <i>N</i>   | 3              | 3                |                   |                         |                         |          |           |                     |
| 35                          | <i>M</i>   | 1.07           | 1.26             |                   |                         |                         |          |           |                     |
|                             | <i>+SD</i> | 0.15           | 0.29             | 0.19              | 0.79                    | -0.40                   | 1.03     | 3.00      | 0.38                |
|                             | <i>N</i>   | 3              | 3                |                   |                         |                         |          |           |                     |

All *p-values* are derived from a two-tailed hypothesis test. *M* = mean, *SD* = standard deviation, *N* = number of animals.



## Statistical Supplemental Methods for Figure 8

### Method of analysis:

Due to unequal variance, Welch's independent t-test was utilized to compare the mean value between the control and peptide-treated group at each timepoint.

Statistics for Figure 8A - Comparison of Serum TTR levels between control and treatment group where peptide was administered at 8 hours following Advanced ESC GalNAc-siRNA (0.5 mg/kg, siTTR-2).

| <i>Timepoint<br/>(days)</i> |            | <i>Control</i> | <i>+ Peptide</i> | <i>Difference</i> | <i>95% CI<br/>Upper</i> | <i>95% CI<br/>Lower</i> | <i>t</i> | <i>df</i> | <i>p-<br/>value</i> |
|-----------------------------|------------|----------------|------------------|-------------------|-------------------------|-------------------------|----------|-----------|---------------------|
| 3                           | <i>M</i>   | 31.72          | 3.27             |                   |                         |                         |          |           |                     |
|                             | <i>+SD</i> | 3.69           | 0.73             | -28.5             | -19.2                   | -37.2                   | -13.1    | 2.15      | 0.004               |
|                             | <i>N</i>   | 3              | 3                |                   |                         |                         |          |           |                     |
| 11                          | <i>M</i>   | 15.55          | 3.14             |                   |                         |                         |          |           |                     |
|                             | <i>+SD</i> | 2.67           | 1.42             | -12.4             | -6.9                    | -17.9                   | -7.1     | 3.05      | 0.005               |
|                             | <i>N</i>   | 3              | 3                |                   |                         |                         |          |           |                     |
| 14                          | <i>M</i>   | 15.91          | 3.65             |                   |                         |                         |          |           |                     |
|                             | <i>+SD</i> | 1.97           | 1.30             | -12.3             | -8.2                    | -16.3                   | -8.9     | 3.46      | 0.002               |
|                             | <i>N</i>   | 3              | 3                |                   |                         |                         |          |           |                     |
| 21                          | <i>M</i>   | 17.60          | 6.77             |                   |                         |                         |          |           |                     |
|                             | <i>+SD</i> | 3.62           | 2.32             | -10.8             | -3.4                    | -18.2                   | -4.4     | 3.41      | 0.02                |
|                             | <i>N</i>   | 3              | 3                |                   |                         |                         |          |           |                     |
| 27                          | <i>M</i>   | 19.01          | 12.73            |                   |                         |                         |          |           |                     |
|                             | <i>+SD</i> | 2.78           | 2.37             | -6.3              | -0.4                    | -12.2                   | -2.9     | 3.9       | 0.04                |
|                             | <i>N</i>   | 3              | 3                |                   |                         |                         |          |           |                     |
| 35                          | <i>M</i>   | 33.80          | 24.37            |                   |                         |                         |          |           |                     |
|                             | <i>+SD</i> | 0.12           | 6.31             | -9.4              | 6.2                     | -25.1                   | -2.6     | 2.0       | 0.12                |
|                             | <i>N</i>   | 2              | 3                |                   |                         |                         |          |           |                     |
| 45                          | <i>M</i>   | 37.60          | 49.83            |                   |                         |                         |          |           |                     |
|                             | <i>+SD</i> | 6.12           | 8.96             | 12.2              | 30.6                    | -6.1                    | 1.95     | 3.53      | 0.13                |
|                             | <i>N</i>   | 3              | 3                |                   |                         |                         |          |           |                     |

All *p*-values are derived from a two-tailed hypothesis test. *M* = mean, *SD* = standard deviation, *N* = number of animals.

Statistical Supplement to Figure 8

Statistics for Figure 8B - Comparison of serum TTR levels between control and treatment group where peptide was administered at day 11 following Advanced ESC GalNAc-siRNA (0.5 mg/kg, siTTR-2).

| <i>Timepoint<br/>(days)</i> |            | <i>Control</i> | <i>+ Peptide</i> | <i>Difference</i> | <i>95% CI<br/>Upper</i> | <i>95% CI<br/>Lower</i> | <i>t</i> | <i>df</i> | <i>p-<br/>value</i> |
|-----------------------------|------------|----------------|------------------|-------------------|-------------------------|-------------------------|----------|-----------|---------------------|
| 3                           | <i>M</i>   | 31.72          | 31.61            |                   |                         |                         |          |           |                     |
|                             | <i>+SD</i> | 3.69           | 4.39             | -0.1              | 9.19                    | -9.42                   | -0.03    | 3.88      | 0.974               |
|                             | <i>N</i>   | 3              | 3                |                   |                         |                         |          |           |                     |
| 11                          | <i>M</i>   | 15.55          | 17.71            |                   |                         |                         |          |           |                     |
|                             | <i>+SD</i> | 2.67           | 2.93             | 2.2               | 8.54                    | -4.22                   | 0.94     | 3.97      | 0.400               |
|                             | <i>N</i>   | 3              | 3                |                   |                         |                         |          |           |                     |
| 14                          | <i>M</i>   | 15.91          | 8.04             |                   |                         |                         |          |           |                     |
|                             | <i>+SD</i> | 1.97           | 1.93             | -7.9              | -3.45                   | -12.31                  | -4.94    | 3.99      | 0.008               |
|                             | <i>N</i>   | 3              | 3                |                   |                         |                         |          |           |                     |
| 21                          | <i>M</i>   | 17.60          | 10.83            |                   |                         |                         |          |           |                     |
|                             | <i>+SD</i> | 3.62           | 2.83             | -6.8              | 0.76                    | -14.31                  | -2.56    | 3.78      | 0.066               |
|                             | <i>N</i>   | 3              | 3                |                   |                         |                         |          |           |                     |
| 27                          | <i>M</i>   | 19.01          | 15.09            |                   |                         |                         |          |           |                     |
|                             | <i>+SD</i> | 2.78           | 4.41             | -3.9              | 5.10                    | -12.93                  | -1.3     | 3.37      | 0.28                |
|                             | <i>N</i>   | 3              | 3                |                   |                         |                         |          |           |                     |
| 35                          | <i>M</i>   | 33.80          | 25.17            |                   |                         |                         |          |           |                     |
|                             | <i>+SD</i> | 0.12           | 6.49             | -8.6              | 7.48                    | -24.75                  | -2.3     | 2.00      | 0.15                |
|                             | <i>N</i>   | 2              | 3                |                   |                         |                         |          |           |                     |
| 45                          | <i>M</i>   | 37.60          | 53.94            |                   |                         |                         |          |           |                     |
|                             | <i>+SD</i> | 6.12           | 11.30            | 16.3              | 39.61                   | -6.93                   | 2.2      | 3.08      | 0.11                |
|                             | <i>N</i>   | 3              | 3                |                   |                         |                         |          |           |                     |

All *p-values* are derived from a two-tailed hypothesis test. *M* = mean, *SD* = standard deviation, *N* = number of animals.

Statistical Supplement to Figure 8

Statistics for Figure 8C - Comparison of serum TTR levels between control and treatment group where peptide was administered at day 14 following Advanced ESC GalNAc-siRNA (0.5 mg/kg, siTTR-2).

| <i>Timepoint<br/>(days)</i> |            | <i>Control</i> | <i>+ Peptide</i> | <i>Difference</i> | <i>95% CI<br/>Upper</i> | <i>95% CI<br/>Lower</i> | <i>t</i> | <i>df</i> | <i>p-<br/>value</i> |
|-----------------------------|------------|----------------|------------------|-------------------|-------------------------|-------------------------|----------|-----------|---------------------|
| 3                           | <i>M</i>   | 31.72          | 29.79            |                   |                         |                         |          |           |                     |
|                             | <i>+SD</i> | 3.69           | 2.29             | -1.93             | 5.61                    | -9.47                   | -0.77    | 3.34      | 0.49                |
|                             | <i>N</i>   | 3              | 3                |                   |                         |                         |          |           |                     |
| 11                          | <i>M</i>   | 15.55          | 17.46            |                   |                         |                         |          |           |                     |
|                             | <i>+SD</i> | 2.67           | 1.68             | 1.90              | 7.36                    | -3.55                   | 1.04     | 3.37      | 0.37                |
|                             | <i>N</i>   | 3              | 3                |                   |                         |                         |          |           |                     |
| 14                          | <i>M</i>   | 15.91          | 17.36            |                   |                         |                         |          |           |                     |
|                             | <i>+SD</i> | 1.97           | 0.77             | 1.45              | 5.71                    | -2.80                   | 1.19     | 2.60      | 0.33                |
|                             | <i>N</i>   | 3              | 3                |                   |                         |                         |          |           |                     |
| 21                          | <i>M</i>   | 17.60          | 7.51             |                   |                         |                         |          |           |                     |
|                             | <i>+SD</i> | 3.62           | 0.77             | -10.09            | -1.60                   | -18.58                  | -4.72    | 2.18      | 0.04                |
|                             | <i>N</i>   | 3              | 3                |                   |                         |                         |          |           |                     |
| 27                          | <i>M</i>   | 19.01          | 14.14            |                   |                         |                         |          |           |                     |
|                             | <i>+SD</i> | 2.78           | 2.64             | -4.87             | 1.29                    | -11.02                  | -2.20    | 3.99      | 0.093               |
|                             | <i>N</i>   | 3              | 3                |                   |                         |                         |          |           |                     |
| 35                          | <i>M</i>   | 33.80          | 21.79            |                   |                         |                         |          |           |                     |
|                             | <i>+SD</i> | 0.12           | 2.40             | -12.02            | -6.08                   | -17.96                  | -8.65    | 2.01      | 0.01                |
|                             | <i>N</i>   | 2              | 3                |                   |                         |                         |          |           |                     |
| 45                          | <i>M</i>   | 37.60          | 46.19            |                   |                         |                         |          |           |                     |
|                             | <i>+SD</i> | 6.12           | 4.71             | 8.59              | 21.30                   | -4.12                   | 1.93     | 3.75      | 0.13                |
|                             | <i>N</i>   | 3              | 3                |                   |                         |                         |          |           |                     |

All *p*-values are derived from a two-tailed hypothesis test. *M* = mean, *SD* = standard deviation, *N* = number of animals.

Statistical Supplement to Figure 8

Statistics for Figure 8D - Comparison of serum TTR levels between control and treatment group where peptide was administered at day 21 following Advanced ESC GalNAc-siRNA (0.5 mg/kg, siTTR-2).

| <i>Timepoint<br/>(days)</i> |            | <i>Control</i> | <i>+ Peptide</i> | <i>Difference</i> | <i>95% CI<br/>Upper</i> | <i>95% CI<br/>Lower</i> | <i>t</i> | <i>df</i> | <i>p-<br/>value</i> |
|-----------------------------|------------|----------------|------------------|-------------------|-------------------------|-------------------------|----------|-----------|---------------------|
| 3                           | <i>M</i>   | 31.72          | 36.50            |                   |                         |                         |          |           |                     |
|                             | <i>+SD</i> | 3.69           | 5.84             | 4.78              | 16.70                   | -7.15                   | 1.20     | 3.38      | 0.31                |
|                             | <i>N</i>   | 3              | 3                |                   |                         |                         |          |           |                     |
| 11                          | <i>M</i>   | 15.55          | 14.30            |                   |                         |                         |          |           |                     |
|                             | <i>+SD</i> | 2.67           | 9.67             | -1.26             | 20.76                   | -23.27                  | -0.22    | 2.30      | 0.85                |
|                             | <i>N</i>   | 3              | 3                |                   |                         |                         |          |           |                     |
| 14                          | <i>M</i>   | 15.91          | 14.62            |                   |                         |                         |          |           |                     |
|                             | <i>+SD</i> | 1.97           | 9.34             | -1.29             | 20.67                   | -23.25                  | -0.23    | 2.18      | 0.84                |
|                             | <i>N</i>   | 3              | 3                |                   |                         |                         |          |           |                     |
| 21                          | <i>M</i>   | 17.60          | 17.83            |                   |                         |                         |          |           |                     |
|                             | <i>+SD</i> | 3.62           | 8.92             | 0.23              | 19.35                   | -18.90                  | 0.04     | 2.64      | 0.97                |
|                             | <i>N</i>   | 3              | 3                |                   |                         |                         |          |           |                     |
| 27                          | <i>M</i>   | 19.01          | 12.27            |                   |                         |                         |          |           |                     |
|                             | <i>+SD</i> | 2.78           | 3.90             | -6.74             | 1.26                    | -14.74                  | -2.44    | 3.62      | 0.078               |
|                             | <i>N</i>   | 3              | 3                |                   |                         |                         |          |           |                     |
| 35                          | <i>M</i>   | 33.80          | 28.77            |                   |                         |                         |          |           |                     |
|                             | <i>+SD</i> | 0.12           | 10.28            | -5.04             | 87.25                   | -97.33                  | -0.69    | 1.00      | 0.61                |
|                             | <i>N</i>   | 2              | 2                |                   |                         |                         |          |           |                     |
| 45                          | <i>M</i>   | 37.60          | 47.97            |                   |                         |                         |          |           |                     |
|                             | <i>+SD</i> | 6.12           | 11.64            | 10.37             | 71.39                   | -50.64                  | 1.16     | 1.38      | 0.41                |
|                             | <i>N</i>   | 3              | 2                |                   |                         |                         |          |           |                     |

All *p-values* are derived from a two-tailed hypothesis test. *M* = mean, *SD* = standard deviation, *N* = number of animals.

## Statistical Supplemental Methods for Figure 9

### Method of analysis:

Due to unequal variance, Welch's independent t-test was utilized to compare the mean value between the control and peptide-treated group at each timepoint.

Statistics for Figure 9C - Comparison of sense strand siRNA liver levels between control and treatment group where peptide was administered 15 minutes following ESC GalNAc-siRNA (0.5 mg/kg, siTTR-1).

| <i>Timepoint<br/>(hours)</i> |            | <i>Control</i> | <i>+ Peptide</i> | <i>Difference</i> | <i>95% CI<br/>Upper</i> | <i>95% CI<br/>Lower</i> | <i>t</i> | <i>df</i> | <i>p-<br/>value</i> |
|------------------------------|------------|----------------|------------------|-------------------|-------------------------|-------------------------|----------|-----------|---------------------|
| 4                            | <i>M</i>   | 5.034          | 3.97             |                   |                         |                         |          |           |                     |
|                              | <i>±SD</i> | 0.31           | 0.28             | 1.07              | 1.74                    | 0.39                    | 4.37     | 3.96      | 0.012               |
|                              | <i>N</i>   | 3              | 3                |                   |                         |                         |          |           |                     |
| 8                            | <i>M</i>   | 5.67           | 4.81             |                   |                         |                         |          |           |                     |
|                              | <i>±SD</i> | 0.81           | 0.65             | 0.86              | 2.56                    | -0.85                   | 1.43     | 3.81      | 0.23                |
|                              | <i>N</i>   | 3              | 3                |                   |                         |                         |          |           |                     |
| 24                           | <i>M</i>   | 2.56           | 2.27             |                   |                         |                         |          |           |                     |
|                              | <i>±SD</i> | 0.22           | 0.30             | 0.29              | 0.92                    | -0.33                   | 1.36     | 3.65      | 0.25                |
|                              | <i>N</i>   | 3              | 3                |                   |                         |                         |          |           |                     |
| 48                           | <i>M</i>   | 0.97           | 0.89             |                   |                         |                         |          |           |                     |
|                              | <i>±SD</i> | 0.22           | 0.28             | 0.077             | 0.65                    | -0.50                   | 0.38     | 3.79      | 0.72                |
|                              | <i>N</i>   | 3              | 3                |                   |                         |                         |          |           |                     |
| 72                           | <i>M</i>   | 0.74           | 0.58             |                   |                         |                         |          |           |                     |
|                              | <i>±SD</i> | 0.56           | 0.087            | 0.16              | 1.50                    | -1.18                   | 0.49     | 2.10      | 0.67                |
|                              | <i>N</i>   | 3              | 3                |                   |                         |                         |          |           |                     |
| 168                          | <i>M</i>   | 0.09           | 0.12             |                   |                         |                         |          |           |                     |
|                              | <i>±SD</i> | 0.023          | 0.006            | -0.032            | 0.022                   | -0.085                  | -2.30    | 2.27      | 0.13                |
|                              | <i>N</i>   | 3              | 3                |                   |                         |                         |          |           |                     |
| 240                          | <i>M</i>   | 0.032          | 0.034            |                   |                         |                         |          |           |                     |
|                              | <i>±SD</i> | 0.0065         | 0.0043           | -0.002            | 0.011                   | -0.015                  | -0.45    | 3.49      | 0.68                |
|                              | <i>N</i>   | 3              | 3                |                   |                         |                         |          |           |                     |

All *p-values* are derived from a two-tailed hypothesis test. *M* = mean, *SD* = standard deviation, *N* = number of animals.

Statistical Supplement to Figure 9

Statistics for Figure 9D - Comparison of antisense strand siRNA liver levels between control and treatment group where peptide was administered 15 minutes following ESC GalNAc-siRNA (0.5 mg/kg, siTTR-1).

| Timepoint (hours) |          | Control | + Peptide | Difference | 95% CI Upper | 95% CI Lower | t      | df   | p-value |
|-------------------|----------|---------|-----------|------------|--------------|--------------|--------|------|---------|
| 4                 | M        | 2.80    | 2.55      |            |              |              |        |      |         |
|                   | $\pm$ SD | 0.45    | 0.30      | -0.24      | 0.68         | -1.16        | -0.77  | 3.47 | 0.49    |
|                   | N        | 3       | 3         |            |              |              |        |      |         |
| 8                 | M        | 2.89    | 2.32      |            |              |              |        |      |         |
|                   | $\pm$ SD | 0.50    | 0.15      | -0.57      | 0.55         | -1.69        | -1.90  | 2.35 | 0.18    |
|                   | N        | 3       | 3         |            |              |              |        |      |         |
| 24                | M        | 1.24    | 1.14      |            |              |              |        |      |         |
|                   | $\pm$ SD | 0.22    | 0.16      | -0.099     | 0.36         | -0.56        | -0.63  | 3.57 | 0.57    |
|                   | N        | 3       | 3         |            |              |              |        |      |         |
| 48                | M        | 0.62    | 0.44      |            |              |              |        |      |         |
|                   | $\pm$ SD | 0.13    | 0.11      | -0.18      | 0.11         | -0.46        | -1.75  | 3.92 | 0.16    |
|                   | N        | 3       | 3         |            |              |              |        |      |         |
| 72                | M        | 0.41    | 0.29      |            |              |              |        |      |         |
|                   | $\pm$ SD | 0.29    | 0.033     | -0.12      | 0.60         | -0.84        | -0.70  | 2.05 | 0.55    |
|                   | N        | 3       | 3         |            |              |              |        |      |         |
| 168               | M        | 0.042   | 0.053     |            |              |              |        |      |         |
|                   | $\pm$ SD | 0.013   | 0.01      | 0.011      | 0.038        | -0.015       | 1.19   | 3.85 | 0.30    |
|                   | N        | 3       | 3         |            |              |              |        |      |         |
| 240               | M        | 0.015   | 0.015     |            |              |              |        |      |         |
|                   | $\pm$ SD | 0.0031  | 0.0007    | -0.00012   | 0.0072       | -0.0074      | -0.064 | 2.22 | 0.95    |
|                   | N        | 3       | 3         |            |              |              |        |      |         |

All p-values are derived from a two-tailed hypothesis test. M = mean, SD = standard deviation, N = number of animals.

Statistical Supplement to Figure 9

Statistics for Figure 9E - Comparison of sense strand RISC loading between control and treatment group where peptide was administered 15 minutes following ESC GalNAc-siRNA (0.5 mg/kg, siTTR-1).

| Timepoint (hours) |          | Control | + Peptide | Difference | 95% CI Upper | 95% CI Lower | t      | df    | p-value |
|-------------------|----------|---------|-----------|------------|--------------|--------------|--------|-------|---------|
| 4                 | M        | 0.052   | 0.302     |            |              |              |        |       |         |
|                   | $\pm$ SD | 0.018   | 0.19      | -0.25      | 0.21         | -0.71        | -2.31  | 2.048 | 0.1448  |
|                   | N        | 3       | 3         |            |              |              |        |       |         |
| 8                 | M        | 0.063   | 0.703     |            |              |              |        |       |         |
|                   | $\pm$ SD | 0.018   | 0.10      | -0.64      | -0.39        | -0.89        | -10.48 | 2.12  | 0.0073  |
|                   | N        | 3       | 3         |            |              |              |        |       |         |
| 24                | M        | 0.082   | 0.26      |            |              |              |        |       |         |
|                   | $\pm$ SD | 0.031   | 0.033     | -0.18      | -0.11        | -0.26        | -6.98  | 3.98  | 0.0023  |
|                   | N        | 3       | 3         |            |              |              |        |       |         |
| 48                | M        | 0.084   | 0.32      |            |              |              |        |       |         |
|                   | $\pm$ SD | 0.0094  | 0.13      | -0.24      | 0.091        | -0.57        | -3.087 | 2.02  | 0.0897  |
|                   | N        | 3       | 3         |            |              |              |        |       |         |
| 72                | M        | 0.061   | 0.21      |            |              |              |        |       |         |
|                   | $\pm$ SD | 0.0099  | 0.013     | -0.15      | -0.12        | -0.18        | -15.94 | 3.75  | 0.0001  |
|                   | N        | 3       | 3         |            |              |              |        |       |         |
| 168               | M        | 0.037   | 0.11      |            |              |              |        |       |         |
|                   | $\pm$ SD | 0.0082  | 0.089     | -0.075     | 0.14         | -0.29        | -1.46  | 2.034 | 0.2796  |
|                   | N        | 3       | 3         |            |              |              |        |       |         |
| 240               | M        | 0.023   | 0.042     |            |              |              |        |       |         |
|                   | $\pm$ SD | 0.0044  | 0.0038    | -0.019     | -0.009       | -0.028       | -5.54  | 3.9   | 0.0056  |
|                   | N        | 3       | 3         |            |              |              |        |       |         |

All p-values are derived from a two-tailed hypothesis test. M = mean, SD = standard deviation, N = number of animals.

Statistical Supplement to Figure 9

Statistics for Figure 9F - Comparison of antisense strand RISC loading between control and treatment group where peptide was administered 15 minutes following ESC GalNAc-siRNA (0.5 mg/kg, siTTR-1).

| Timepoint (hours) |          | Control | + Peptide | Difference | 95% CI Upper | 95% CI Lower | t    | df    | p-value |
|-------------------|----------|---------|-----------|------------|--------------|--------------|------|-------|---------|
| 4                 | M        | 0.05    | 0.92      |            |              |              |      |       |         |
|                   | $\pm$ SD | 0.013   | 0.71      | 0.87       | 2.64         | -0.91        | 2.1  | 2.0   | 0.17    |
|                   | N        | 3       | 3         |            |              |              |      |       |         |
| 8                 | M        | 0.083   | 4.03      |            |              |              |      |       |         |
|                   | $\pm$ SD | 0.013   | 0.97      | 3.94       | 6.35         | 1.54         | 7.06 | 2.0   | 0.02    |
|                   | N        | 3       | 3         |            |              |              |      |       |         |
| 24                | M        | 0.18    | 1.32      |            |              |              |      |       |         |
|                   | $\pm$ SD | 0.06    | 0.27      | 1.14       | 1.77         | 0.51         | 7.13 | 2.2   | 0.015   |
|                   | N        | 3       | 3         |            |              |              |      |       |         |
| 48                | M        | 0.21    | 2.37      |            |              |              |      |       |         |
|                   | $\pm$ SD | 0.054   | 0.85      | 2.15       | 4.26         | 0.045        | 4.36 | 2.02  | 0.048   |
|                   | N        | 3       | 3         |            |              |              |      |       |         |
| 72                | M        | 0.2     | 1.18      |            |              |              |      |       |         |
|                   | $\pm$ SD | 0.02    | 0.48      | 0.98       | 2.18         | -0.22        | 3.5  | 2.01  | 0.073   |
|                   | N        | 3       | 3         |            |              |              |      |       |         |
| 168               | M        | 0.17    | 0.86      |            |              |              |      |       |         |
|                   | $\pm$ SD | 0.048   | 0.63      | 0.69       | 2.23         | -0.85        | 1.9  | 2.023 | 0.20    |
|                   | N        | 3       | 3         |            |              |              |      |       |         |
| 240               | M        | 0.083   | 0.33      |            |              |              |      |       |         |
|                   | $\pm$ SD | 0.011   | 0.14      | 0.25       | 0.59         | -0.085       | 3.18 | 2.03  | 0.085   |
|                   | N        | 3       | 3         |            |              |              |      |       |         |

All p-values are derived from a two-tailed hypothesis test. M = mean, SD = standard deviation, N = number of animals.



## Statistical Supplemental Methods for Figure 10

### Method of analysis:

Due to unequal variance, Welch's independent t-test was utilized to compare the mean value of siRNA liver levels and RISC loading between the control and +AAV groups at the day 14, 21 and 28 timepoints.

Statistics for Figure 10C - Comparison of antisense strand siRNA liver levels between control (no AAV) and +AAV groups following Advanced ESC GalNAc-siRNA (3 mg/kg, siF12-1).

| <i>Timepoint<br/>(days)</i> |            | <i>Control<br/>(ug/g)</i> | <i>+ AAV<br/>(ug/g)</i> | <i>Difference</i> | <i>95% CI<br/>Upper</i> | <i>95% CI<br/>Lower</i> | <i>t</i> | <i>df</i> | <i>p-<br/>value</i> |
|-----------------------------|------------|---------------------------|-------------------------|-------------------|-------------------------|-------------------------|----------|-----------|---------------------|
| 14                          | <i>M</i>   | 0.60                      | 0.79                    |                   |                         |                         |          |           |                     |
|                             | <i>+SD</i> | 0.049                     | 0.11                    | -0.19             | 0.056                   | -0.43                   | -2.6     | 2.72      | 0.089               |
|                             | <i>N</i>   | 3                         | 3                       |                   |                         |                         |          |           |                     |
| 21                          | <i>M</i>   | 0.36                      | 0.45                    |                   |                         |                         |          |           |                     |
|                             | <i>+SD</i> | 0.087                     | 0.19                    | -0.09             | 0.32                    | -0.5                    | -0.73    | 2.77      | 0.52                |
|                             | <i>N</i>   | 3                         | 3                       |                   |                         |                         |          |           |                     |
| 28                          | <i>M</i>   | 0.14                      | 0.16                    |                   |                         |                         |          |           |                     |
|                             | <i>+SD</i> | 0.0063                    | 0.02                    | -0.019            | 0.026                   | -0.064                  | -1.6     | 2.37      | 0.23                |
|                             | <i>N</i>   | 3                         | 3                       |                   |                         |                         |          |           |                     |

All *p*-values are derived from a two-tailed hypothesis test. *M* = mean, *SD* = standard deviation, *N* = number of animals.

Statistical Supplement to Figure 10

Statistics for Figure 10D – Ago-APP Comparison (data bars 2 through 7) - Comparison of antisense strand siRNA loaded into RISC between control (no AAV) and +AAV groups using the Ago-APP pulldown approach.

| Timepoint (days) |          | Control (ng/g) | + AAV (ng/g) | Difference | 95% CI Upper | 95% CI Lower | t      | df    | p-value |
|------------------|----------|----------------|--------------|------------|--------------|--------------|--------|-------|---------|
| 14               | M        | 0.86           | 2.09         |            |              |              |        |       |         |
|                  | $\pm$ SD | 0.21           | 0.12         | -1.23      | -0.803       | -1.66        | -8.86  | 3.2   | 0.0024  |
|                  | N        | 3              | 3            |            |              |              |        |       |         |
| 21               | M        | 0.48           | 1.43         |            |              |              |        |       |         |
|                  | $\pm$ SD | 0.05           | 0.41         | -0.95      | 0.037        | -1.93        | -4.028 | 2.061 | 0.054   |
|                  | N        | 3              | 3            |            |              |              |        |       |         |
| 28               | M        | 0.29           | 0.61         |            |              |              |        |       |         |
|                  | $\pm$ SD | 0.021          | 0.09         | -0.33      | -0.12        | -0.53        | -6.14  | 2.21  | 0.02    |
|                  | N        | 3              | 3            |            |              |              |        |       |         |

All p-values are derived from a two-tailed hypothesis test. M = mean, SD = standard deviation, N = number of animals.

Statistics for Figure 10D – FLAG-mAgo2 Comparison (data bars 9 through 14) - Comparison of antisense strand siRNA loaded into RISC between control (no AAV) and +AAV groups using the FLAG pulldown approach.

| Timepoint (days) |          | Control (ng/g) | + AAV (ng/g) | Difference | 95% CI Upper | 95% CI Lower | t      | df   | p-value |
|------------------|----------|----------------|--------------|------------|--------------|--------------|--------|------|---------|
| 14               | M        | 0.003          | 1.31         |            |              |              |        |      |         |
|                  | $\pm$ SD | 0.0002         | 0.073        | -1.31      | -1.13        | -1.49        | -32    | 2    | 0.001   |
|                  | N        | 3              | 3            |            |              |              |        |      |         |
| 21               | M        | 0.0038         | 1.082        |            |              |              |        |      |         |
|                  | $\pm$ SD | 0.0001         | 0.29         | -1.08      | -0.35        | -1.81        | -6.34  | 2    | 0.024   |
|                  | N        | 3              | 3            |            |              |              |        |      |         |
| 28               | M        | 0.0088         | 0.36         |            |              |              |        |      |         |
|                  | $\pm$ SD | 0.0041         | 0.045        | -0.35      | -0.24        | -0.46        | -13.51 | 2.03 | 0.0051  |
|                  | N        | 3              | 3            |            |              |              |        |      |         |

All p-values are derived from a two-tailed hypothesis test. M = mean, SD = standard deviation, N = number of animals.

## SUPPLEMENTAL TABLE S1

RT-qPCR primers and probes for quantifying antisense strands.

| siRNA | Primer       | Sequence (5'-3')                                          |
|-------|--------------|-----------------------------------------------------------|
| siTTR | RT           | GTCGTATCCAGTGCAGGGTCCGAGGTATTCGCACTGGATACGACAAAACAGTGT    |
|       | Forward qPCR | GCCGCGCTTATAGAGCAAG                                       |
|       | TaqMan Probe | CTGGATACGACAAAACAGT                                       |
|       | Reverse qPCR | GTGCAGGGTCCGAGGT                                          |
| siF7  | RT           | GTCGTATCCAGTGCAGGGTCCGAGGTATTCGCACTGGATACGACGCCAGGATCA    |
|       | Forward qPCR | GCCGCGCTTAAGACTTGAGA                                      |
|       | TaqMan Probe | CTGGATACGACGCCAGGAT                                       |
|       | Reverse qPCR | GTGCAGGGTCCGAGGT                                          |
| siF9  | RT           | GTCGTATCCAGTGCAGGGTCCGAGGTATTCGCACTGGATACGACTTCAGTACCTTAG |
|       | Forward qPCR | GCCGCGCTAGTGGAATC                                         |
|       | TaqMan Probe | CTGGATACGACTTCAGTAC                                       |
|       | Reverse qPCR | GTGCAGGGTCCGAGGT                                          |
| siF12 | RT           | GTCGTATCCAGTGCAGGGTCCGAGGTATTCGCACTGGATACGACCAGAACTCA     |
|       | Forward qPCR | GCCGCGCTAAAGCACTTTAT                                      |
|       | TaqMan Probe | CTGGATACGACCAGAACT                                        |
|       | Reverse qPCR | GTGCAGGGTCCGAGGT                                          |

SUPPLEMENTARY FIGURES

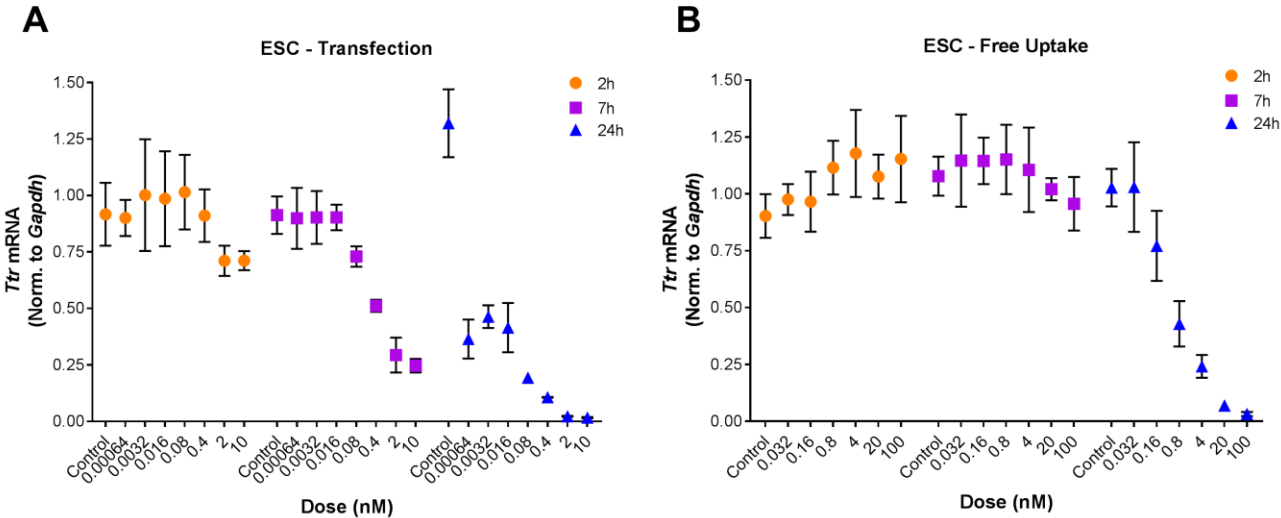

**Figure S1:** ESC (siTTR-1) GalNAc-siRNA-mediated knockdown of *Ttr* mRNA in primary mouse hepatocytes (PMH) following transfection (**A**) or free uptake (**B**) relative to *Gapdh*. A dose response and time course were carried out for all conditions. Data is represented as mean ± SD, for N = 3.

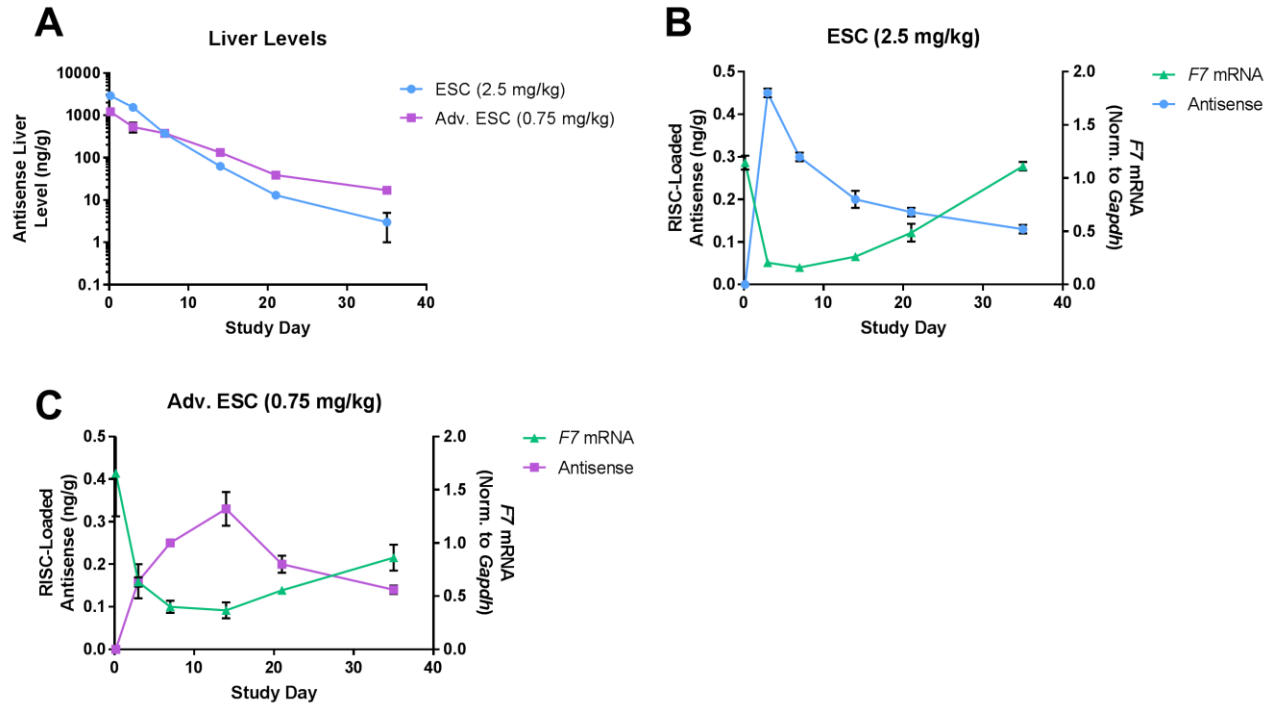

**Figure S2:** Increased siRNA stability improves knockdown and duration of activity. Cohorts of mice were dosed with ESC (2.5 mg/kg, siF7-1) or Advanced ESC (0.75 mg/kg, siF7-2) siRNA targeting *F7* (A-C). Animals were sacrificed after 4 hours and on days 3, 7, 14, 21 and 35 post dose. Antisense siRNA levels ( $\mu\text{g/g}$ ,  $\mu\text{g}$  antisense strand per gram of liver) were measured from total liver (A) and plotted on a log<sub>10</sub> scale. RISC-loaded antisense siRNA levels were also measured (ng/g, ng of antisense strand per gram of liver) and plotted for ESC (B) and Advanced ESC (C) siRNAs. *F7* mRNA knockdown was quantified and normalized to *Gapdh* for all samples (B-C). Data is represented as mean  $\pm$  SD, for N = 3.

**A**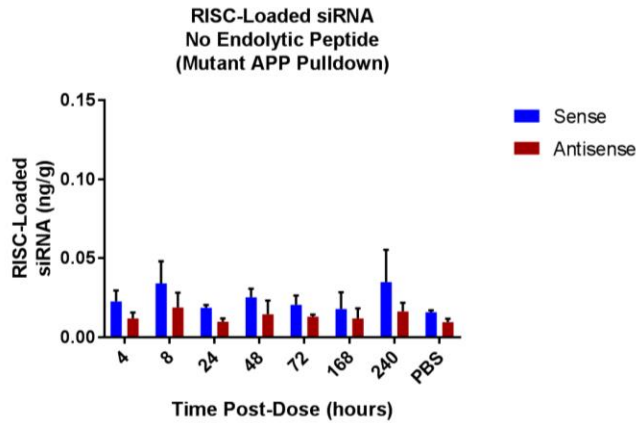**B**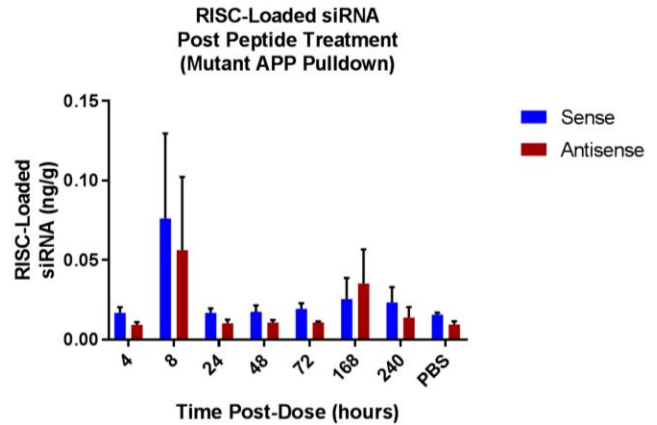

**Figure S3:** Additional Ago-APP controls for Figure 9. An ESC GalNAc-siRNA (siTTR-1) targeting *Ttr* was dosed SC at 0.5 mg/kg. Half of the mice in the study were treated with 5 mg/kg of the GalNAc-INF7 endolytic peptide dosed SC 15 min after the siRNA dose. Cohorts of mice were sacrificed at several times post-dose (4 hours through day 10). Antisense (red) and sense (blue) strand RISC loading was quantified by RT-qPCR in control (**A**) or endolytic peptide-treated animals (**B**) using a mutant Ago-APP peptide in which all tryptophan residues are mutated to alanine, removing its capacity to bind Argonaute proteins (1). Data is represented as mean  $\pm$  SD, for N = 3.

## SUPPLEMENTARY REFERENCE

- Hauptmann, J., Schraivogel, D., Bruckmann, A., Manickavel, S., Jakob, L., Eichner, N., Pfaff, J., Urban, M., Sprunck, S., Hafner, M. *et al.* (2015) Biochemical isolation of Argonaute protein complexes by Ago-APP. *Proc Natl Acad Sci U S A*, **112**, 11841-11845.
